# Supplementary material for: Antifungal Potential of Marine Organisms of the Yucatan Peninsula (Mexico) against Medically Important Candida spp
Source: MDPI journal article supplement (doi:10.3390/molecules28020606), 2023-01-06
Supplement: s1 [file s1]

# Antifungal Potential of Marine Organisms of the Yucatan Peninsula (Mexico) against Medically Important *Candida* spp.

Dawrin Pech-Puch <sup>1,2</sup>, Diana Grilo <sup>3</sup>, Susana Eunice Calva-Pérez <sup>1</sup>, Andreia Pedras <sup>3</sup>, Harold Villegas-Hernández <sup>1</sup>, Sergio Guillén-Hernández <sup>1</sup>, Raúl Díaz-Gamboa <sup>1</sup>, Mateo Forero Tunjano <sup>4</sup>, Jaime Rodríguez <sup>4</sup>, Oscar A. Lenis-Rojas <sup>3,\*</sup>, Carlos Jiménez <sup>4,\*</sup> and Catarina Pimentel <sup>3,\*</sup>

<sup>1</sup> Departamento de Biología Marina, Universidad Autónoma de Yucatán, Km. 15.5, Carretera Mérida-Xmatkuil, A.P. 4-116 Itzimná, Merida C.P. 97100, Mexico

<sup>2</sup> Escuela Nacional de Estudios Superiores Unidad Mérida (ENES Mérida), Universidad Nacional Autónoma de México (UNAM), Carretera Mérida-Tetiz km 4.5, Tablaje, Catastral No. 6998, Municipio de Ucu, Ucu C.P. 97357, Mexico

<sup>3</sup> Instituto de Tecnologia Química e Biológica António Xavier (ITQB NOVA), Universidade Nova de Lisboa, Oeiras, 1070-312 Lisbon, Portugal

<sup>4</sup> Centro de Interdisciplinar de Química e Biología (CICA), Facultade de Ciencias, Universidade da Coruña, 15071 Coruña, Spain

\* Correspondence: oscar.rojas@itqb.unl.pt (O.A.L.-R.); carlos.jimenez@udc.es (C.J.); pimentel@itqb.unl.pt (C.P.)

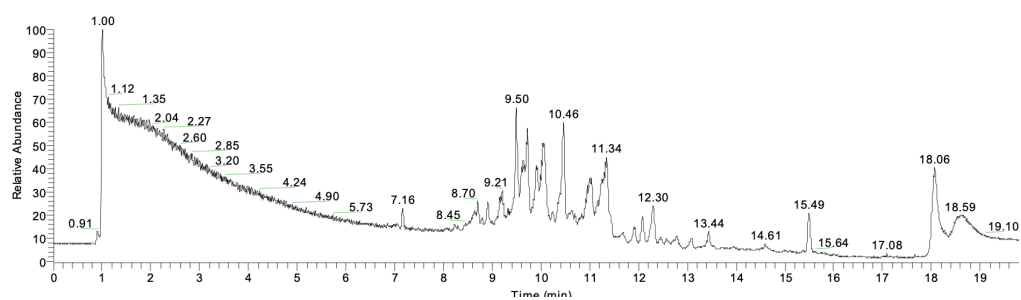

**Figure S1.** UHPLC chromatogram of R2 fraction from UHPLC-HRMS experiment.

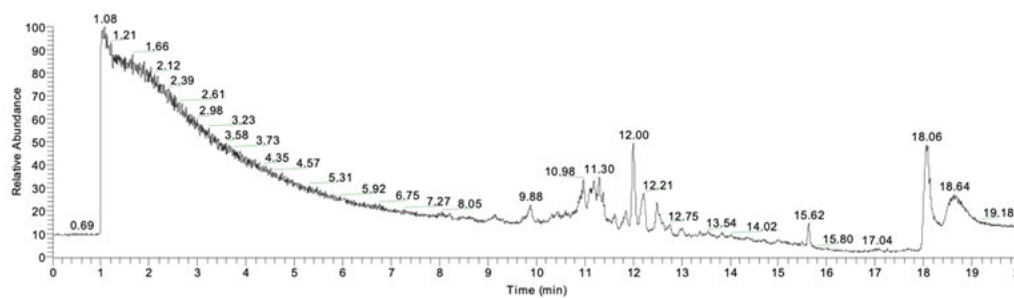

**Figure S2.** UHPLC chromatogram of R3 fraction from UHPLC-HRMS experiment.

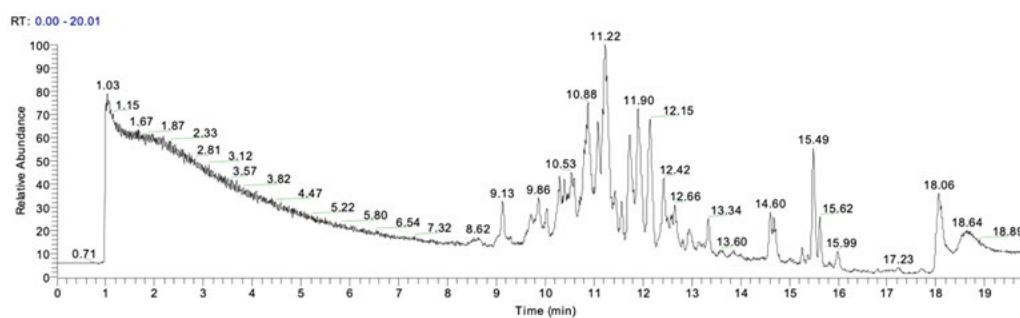

**Figure S3.** UHPLC chromatogram of R5 fraction from UHPLC-HRMS experiment.

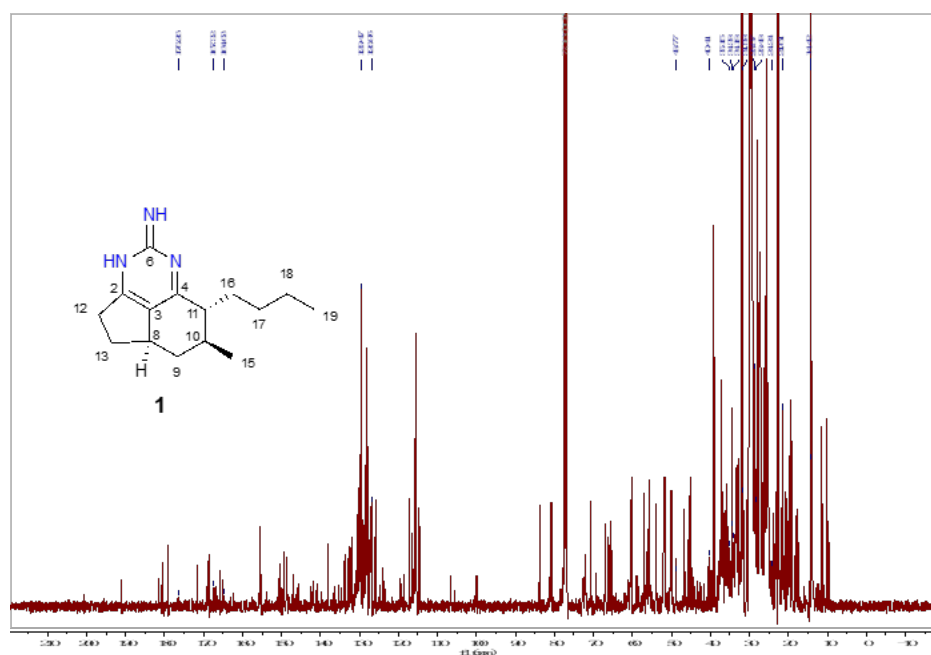

**Figure S4.**  $^{13}\text{C}$  NMR spectrum of R4 subfraction with the main chemical shifts of **1**.

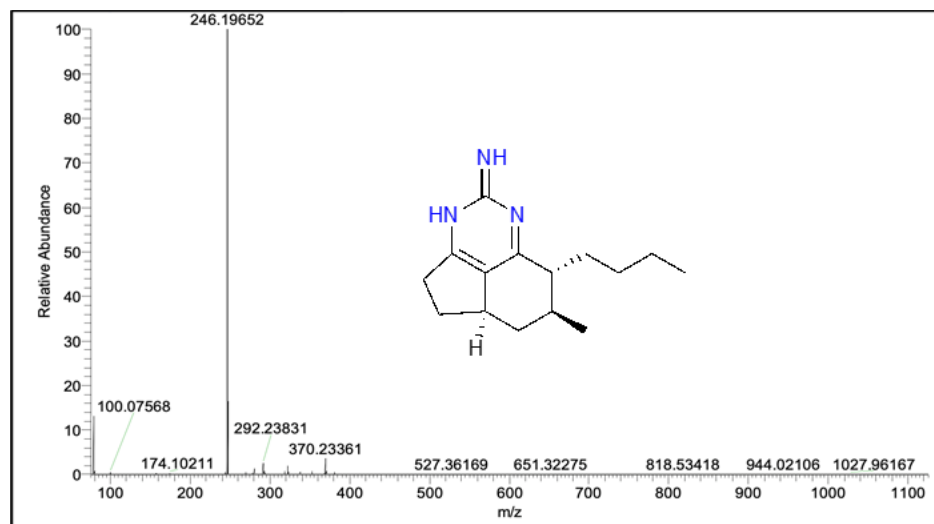

Figure S5. HRMS-ESI of the compound 1.

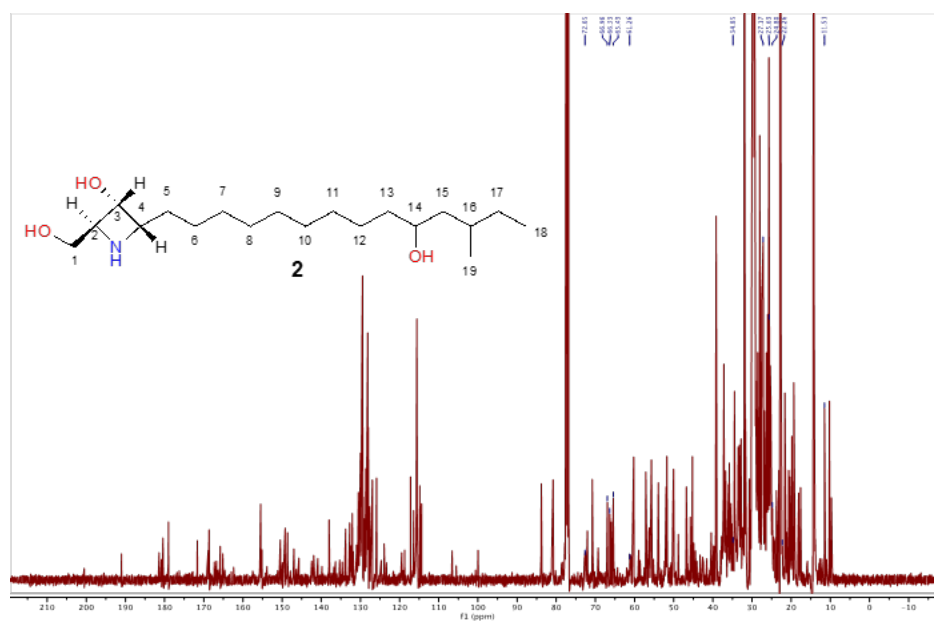

Figure S6. <sup>13</sup>C NMR spectrum of R4 subfraction with the main chemical shifts of 2.

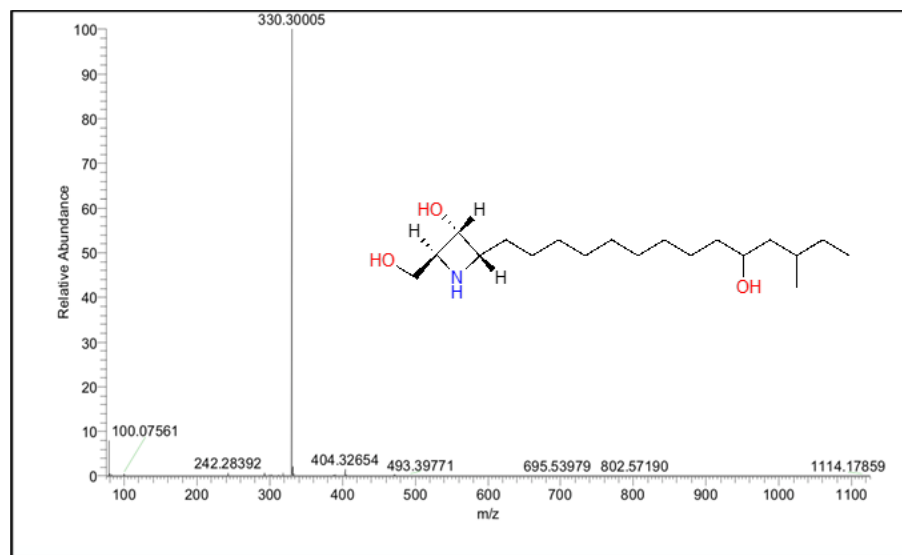

**Figure S7.** HRMS-ESI of the compound 2.

**Table S1.** Concentration range tested for MIC and MFC determination.

| Concentration range tested ( $\mu\text{g/mL}$ ) |              |
|-------------------------------------------------|--------------|
| Crude extract                                   |              |
| CZE56                                           | 125–0.244    |
| MA18-4                                          | 35.75–0.070  |
| E29                                             | 41.5–0.081   |
| E35                                             | 62.5–0.122   |
| Sub-fractions of E35                            |              |
| DF                                              | 60.00–0.117  |
| BF                                              | 117.50–0.229 |
| WMF                                             | 130.00–0.254 |
| Sub-Fraction                                    |              |
| R1                                              | 135–0.264    |
| R2                                              | 130–0.254    |
| R3                                              | 80–0.176     |
| R4                                              | 60–0.117     |
| R5                                              | 115–0.225    |
| R6                                              | 135–0.264    |
| R7                                              | 135–0.264    |
